# Supplementary material for: Tuna Dark Muscle Feeding Improved the Meat Quality of Holland Mini-Piglets and Modulated the Gut Microbiota
Source: MDPI journal article supplement (doi:10.3390/foods13101577), 2024-05-18
Supplement: s1 [file s1]

*Supporting information for*

**Tuna dark muscle feeding improved the meat quality of Holland mini-piglets and modulated the gut microbiota**

Chenyang Lu<sup>1,2\*</sup>, Yuanming Zhang<sup>2</sup>, Yang Qin<sup>2</sup>, Jun Zhou<sup>2</sup>, Yanbo Wang<sup>1</sup>, Xiurong Su<sup>2</sup>, Jiaojiao Han<sup>2\*</sup>

<sup>1</sup> School of Food Science and Biotechnology, Zhejiang Gongshang University, Hangzhou 310018, China.

<sup>2</sup> School of Marine Science, Ningbo University, Ningbo 315832, China

\* Corresponding author

Dr. Chenyang Lu

School of Food Science and Biotechnology, Zhejiang Gongshang University, 18 Xuezheng Road, Hangzhou 310018, China

Dr. Jiaojiao Han

School of Marine Science, Ningbo University, 169 Qixing South Road, Ningbo 315832, China

Tel/Fax: +86 574 87608368

E-mail address: hanjiaojiao@nbu.edu.cn

**Table S1.** The ingredients levels of chow diet used in this study.

| <b>Ingredients</b>            | <b>Content (%)</b> |
|-------------------------------|--------------------|
| Corn                          | 51.7               |
| Soybean meal                  | 21.2               |
| Wheat                         | 15                 |
| Soybean oil                   | 0.9                |
| Fish meal                     | 6                  |
| Minerals mixture <sup>a</sup> | 5.15               |
| Vitamins mixture <sup>b</sup> | 0.05               |
| Total                         | 100                |

a Iron=84 mg/kg, zinc=103 mg/kg, copper=32 mg/kg, manganese=34 mg/kg, selenium=0.19 mg/kg, iodine=0.7 mg/kg.

b Vitamin A=8000 IU/kg, vitamin B1=9.7 mg/kg, vitamin B2=2.6 mg/kg, vitamin B6=10.4 mg/kg, vitamin B12=0.09 mg/kg, vitamin D3=121 IU/kg, vitamin E=16 IU/kg, vitamin K3=2.9 mg/kg, nicotinic acid=15.2 mg/kg, folic acid=0.66 mg/kg, biotin=0.32 mg/kg.

**Table S2.** The nutrient levels of chow diet used in this study.

| <b>Nutrients</b>        | <b>Content (%)</b> |
|-------------------------|--------------------|
| Dry matter              | 83.86              |
| Crude protein           | 19.6               |
| Crude fat               | 3.64               |
| Crude fiber             | 3.01               |
| Ash                     | 3.00               |
| Neutral detergent fiber | 9.58               |
| Acid detergent fiber    | 4.22               |
| Starch                  | 40.83              |
| Calcium                 | 0.34               |
| Phosphorus              | 0.53               |
| Available phosphorus    | 0.29               |
| Lysine                  | 1.28               |
| Methionine              | 0.39               |
| Threonine               | 0.82               |

**Table S3.** Performance descriptions of sensors in PEN3.

| Number | Sensor name | Object substances               |
|--------|-------------|---------------------------------|
| S1     | W1C         | Aromatics                       |
| S2     | W5S         | Nitrogen oxides                 |
| S3     | W3C         | Ammonia and aromatics           |
| S4     | W6S         | Hydrogen                        |
| S5     | W5C         | Aromatics and aliphatics        |
| S6     | W1S         | Methane                         |
| S7     | W1W         | Sulfides                        |
| S8     | W2S         | Alcohols, aldehydes and ketones |
| S9     | W2W         | Aromatics and organic sulfides  |
| S10    | W3S         | Aliphatics                      |

**Table S4.** The content of each volatile component after dark muscle treatment.

| Compound               | longissimus dorsi muscle(ng/100g) |                |                | rib muscle (ng/100g) |                |                | tendon meat (ng/100g) |                 |                |
|------------------------|-----------------------------------|----------------|----------------|----------------------|----------------|----------------|-----------------------|-----------------|----------------|
|                        | con                               | HD             | LD             | con                  | HD             | LD             | con                   | HD              | LD             |
| Hexanal                | 121.92±2.36                       | 2452.27±209.38 | 1134.27±377.32 | 262.16±20.25         | 342.44±76.35   | 220.11±63.25   | 2556.65±235.26        | 9420.91±602.46  | 3271.85±602.67 |
| Nonanal                | 309.87±2.39                       | 3846.48±299.38 | 2140.37±268.48 | 134.93±35.26         | 369.34±37.24   | 201.57±71.24   | 224.31±37.26          | 7270.85±803.21  | 1421.56±405.25 |
| Pentanal               | 53.73±1.57                        | 6200.19±537.96 | 2177.48±258.28 | —                    | —              | —              | —                     | 1375.41±302.36  | 92.53±20.36    |
| Octanal                | —                                 | 5277.33±469.38 | 6310.68±375.59 | —                    | —              | —              | —                     | —               | —              |
| Heptanal               | 87.91±1.47                        | 5108.13±627.98 | 8730.18±275.48 | 66.26±6.25           | 7072.87±444.25 | 2159.29±302.41 | —                     | 2812.64±267.26  | 265.53±64.26   |
| Undecylaldehyde        | —                                 | 6757.17±682.37 | 6143.62±537.63 | —                    | —              | —              | —                     | —               | —              |
| Hexadecaldehyde        | 34.38±1.36                        | 5877.37±839.54 | —              | —                    | —              | —              | —                     | —               | —              |
| 2-heptanol             | —                                 | —              | —              | 122.57±178.36        | 1287.26±58.34  | 340.82±13.25   | —                     | —               | —              |
| 1-butanol              | —                                 | —              | —              | 327.19±56.03         | 1288.85±66.34  | 23.61±2.47     | —                     | —               | —              |
| 1-octene-3-alcohol     | —                                 | —              | —              | 23.84±2.39           | 276.64±76.79   | 233.44±23.46   | —                     | —               | —              |
| 1-octanol              | 92±1.97                           | 1044.59±173.58 | 787.46±48.27   | —                    | 211.84±66.24   | 121.28±32.69   | —                     | —               | —              |
| 3-pentyne-2-ol         | —                                 | 3639.47±179.38 | —              | —                    | —              | —              | —                     | —               | —              |
| 4-methyl-5-hexene-2-ol | —                                 | 9277.67±183.47 | —              | —                    | —              | —              | —                     | —               | —              |
| Methyl mercaptan       | 32.77±0.96                        | —              | 3675.87±264.99 | —                    | —              | —              | 30.92±10.25           | 3715.24±903.37  | 1269.14±302.67 |
| 2-propene-1-alcohol    | —                                 | —              | 4655.53±165.38 | —                    | —              | —              | —                     | —               | —              |
| 3-methyl-1-butanol     | —                                 | —              | —              | —                    | —              | —              | 75.62±13.26           | 9551.22±1001.36 | 1557.44±699.36 |
| 2-methyl-propanol      | —                                 | —              | —              | —                    | —              | —              | 46.43±8.25            | 1984.21±340.77  | 1715.26±490.02 |

|                                    |               |                |                |                |                |                |                |                |                |
|------------------------------------|---------------|----------------|----------------|----------------|----------------|----------------|----------------|----------------|----------------|
| Ethyl formate                      | —             | —              | —              | 262.33±67.47   | 500.24±68.24   | 34.15±11.24    | —              | 53.74±20.36    | 1347.53±306.67 |
| Ethyl propionate                   | —             | —              | —              | 1635.13±286.26 | 1426.44±57.03  | —              | —              | —              | —              |
| Butyric acid, 2-methylpropyl ester | —             | —              | —              | 172.18±53.72   | 368.24±40.24   | 27.44±13.24    | —              | —              | —              |
| Isoamyl acetate                    | 45.37±1.86    | 1588.93±158.89 | 677.55±279.27  | —              | 255.74±50.46   | 211.79±56.35   | —              | —              | —              |
| Methyl butyrate                    | 22450±74.38   | 22450.58±99.57 | 22450.38±75.93 | 22450.26±60.27 | 22450.29±75.01 | 22450.35±73.25 | 22450.15±80.24 | 22450.26±59.36 | 22450.26±97.35 |
| Isobutyl isoamyl ester             | 1980.79±97.37 | 4750.87±98.26  | 2359.93±389.28 | 420.93±56.28   | 200.81±68.23   | 29.46±14.25    | —              | 2454.34±602.68 | 2769.94±690.29 |
| Ethyl octanoate                    | —             | 5058.77±95.37  | —              | —              | —              | —              | —              | —              | —              |
| Allyl 2-ethylbutyrate              | —             | —              | —              | 222.69±52.26   | 421.97±53.56   | 25.34±10.35    | —              | —              | —              |
| Ethyl butyrate                     | —             | —              | —              | 615.26±34.21   | —              | —              | —              | 121.54±36.97   | 2679.64±683.68 |
| Amyl propionate                    | —             | —              | —              | —              | —              | 234.72±61.45   | —              | —              | —              |
| Ethyl valerate                     | —             | —              | —              | —              | —              | —              | —              | 33.73±11.03    | —              |
| Methyl formate                     | —             | —              | —              | —              | —              | —              | —              | 2763.56±893.56 | 1527.54±502.89 |
| Methyl 2-methyl-butyrate           | —             | —              | —              | —              | —              | —              | —              | 45.74±28.35    | —              |
| Carbamate                          | —             | —              | —              | —              | —              | —              | 41.55±23.44    | 2151.24±246.7  | 2363.74±957.57 |
| Methyl octanoate                   | —             | —              | —              | —              | —              | —              | 34.64±2.34     | 1820.57±305.36 | 3070.65±779.36 |
| acetic acid                        | 1980.76±84.86 | 6318.94±78.36  | 3280.27±552.71 | —              | —              | —              | —              | —              | —              |
| butyrate                           | 5302±102.57   | 6607.49±111.36 | 5817.93±324.48 | 7935.26±509.26 | 7708.46±39.26  | 6535.24±350.23 | 1507.33±302.15 | 1324.26±793.95 | 1203.24±305.26 |
| Methyl tartaric acid               | 46.14±1.58    | 9289.37±156.78 | 9959.32±276.27 | —              | —              | —              | —              | —              | —              |
| boric acid                         | —             | —              | —              | —              | 182.44±49.25   | 126.43±73.26   | —              | —              | —              |
| Valeric acid                       | —             | —              | —              | 2152.25±602.25 | 1009.75±48.68  | 2328.26±267.36 | —              | —              | —              |
| Cathinone                          | —             | —              | —              | 180.45±35.22   | 205.19±61.03   | 222.36±36.27   | 2097.69±208.37 | 2035.45±308.63 | 1802.46±496.27 |
| 2-heptanone                        | 71.64±2.37    | 2272.85±101.26 | 1870.94±247.27 | 198.59±73.26   | 296.51±30.35   | 216.26±73.72   | —              | —              | —              |
| 2,4-dimethyl-3-hexanone            | 5394.79±94.48 | 5252.48±112.48 | 5562.34±272.84 | —              | —              | —              | —              | —              | —              |

|                            |            |                |                |              |              |            |                |                |                |
|----------------------------|------------|----------------|----------------|--------------|--------------|------------|----------------|----------------|----------------|
| Pentane                    | 65.45±6.83 | 4500.58±92.48  | 1625.65±268.37 | —            | —            | —          | 48.14±21.56    | 3663.35±976.26 | —              |
| Nonane                     | 31.59±1.58 | 3535.37±66.37  | 8478.74±548.27 | 415.15±39.36 | 351.34±42.45 | 24.71±8.26 | —              | 2226.16±536.26 | —              |
| 2-cyclopropyl<br>butane    | —          | 4262.38±109.36 | 3466.83±277.78 | —            | —            | —          | —              | 36.85±9.36     | —              |
| 1,3,5-<br>cycloheptene     | —          | 4626.77±89.26  | 5566.53±268.27 | —            | —            | —          | 1532.93±203.56 | —              | 3556.86±698.46 |
| 1-iodo-3-<br>methylbenzene | —          | 4628.88±83.48  | —              | —            | —            | —          | —              | —              | —              |
| octane                     | —          | —              | —              | 153.07±54.23 | 195.81±42.56 | 21.54±5.29 | —              | 2462.51±596.36 | 28.33±7.46     |
| toluene                    | —          | —              | —              | —            | —            | —          | 99.35±27.45    | 2156.36±406.28 | 1096.84±302.55 |
| 2-furan                    | —          | —              | —              | —            | —            | —          | —              | 2245.75±384.66 | 1288.86±297.35 |

---

**Table S5.** The RDP classifications of the sequence reads at the phylum level. The data were expressed as the mean  $\pm$  SD, n=8.

| Taxonomy               | con              | HD               | LD               |
|------------------------|------------------|------------------|------------------|
| <i>Firmicutes</i>      | 57.76 $\pm$ 3.97 | 54.91 $\pm$ 3.84 | 60.64 $\pm$ 2.43 |
| <i>Bacteroidetes</i>   | 17.93 $\pm$ 3.11 | 30.95 $\pm$ 2.36 | 22.93 $\pm$ 1.68 |
| <i>Spirochaetes</i>    | 18.58 $\pm$ 2.34 | 1.69 $\pm$ 0.38  | 9.27 $\pm$ 2.22  |
| <i>Proteobacteria</i>  | 2.18 $\pm$ 0.86  | 3.84 $\pm$ 0.6   | 4.32 $\pm$ 1.01  |
| <i>Fibrobacteres</i>   | 0.13 $\pm$ 0.05  | 0.17 $\pm$ 0.04  | 0.01 $\pm$ 0.01  |
| <i>Lentisphaerae</i>   | 0.44 $\pm$ 0.16  | 0.23 $\pm$ 0.03  | 0.01 $\pm$ 0.01  |
| <i>Synergistetes</i>   | 0.07 $\pm$ 0.02  | 0.29 $\pm$ 0.3   | 0 $\pm$ 0        |
| <i>Tenericutes</i>     | 0.36 $\pm$ 0.03  | 0.56 $\pm$ 0.03  | 0.05 $\pm$ 0.03  |
| <i>Verrucomicrobia</i> | 0.04 $\pm$ 0.02  | 0.1 $\pm$ 0.04   | 0.01 $\pm$ 0     |



**Table S6.** The RDP classifications of the sequence reads at the genus level in mice.

The data were expressed as the mean  $\pm$  SD, n=8.

| Taxonomy                         | con              | HD               | LD               |
|----------------------------------|------------------|------------------|------------------|
| <i>Prevotella</i>                | 4.39 $\pm$ 0.74  | 7.23 $\pm$ 1.33  | 5.74 $\pm$ 1.42  |
| <i>Ruminococcus</i>              | 22.5 $\pm$ 2.4   | 30.57 $\pm$ 3.68 | 21.59 $\pm$ 2.43 |
| <i>Treponema</i>                 | 20.58 $\pm$ 1.52 | 5.81 $\pm$ 2.39  | 1.99 $\pm$ 0.59  |
| <i>Alistipes</i>                 | 5.06 $\pm$ 1.21  | 3.54 $\pm$ 0.73  | 2.67 $\pm$ 0.3   |
| <i>Faecalibacterium</i>          | 0.98 $\pm$ 0.29  | 4.46 $\pm$ 0.77  | 3.54 $\pm$ 0.32  |
| <i>Clostridium IV</i>            | 0.55 $\pm$ 0.09  | 3.76 $\pm$ 0.54  | 0.33 $\pm$ 0.22  |
| <i>Tannerella</i>                | 3.98 $\pm$ 0.44  | 7.24 $\pm$ 0.85  | 3.51 $\pm$ 0.43  |
| <i>Gemmiger</i>                  | 3.74 $\pm$ 0.76  | 0.08 $\pm$ 0.01  | 0.8 $\pm$ 0.31   |
| <i>Parabacteroides</i>           | 1.38 $\pm$ 0.3   | 3.85 $\pm$ 0.82  | 3.43 $\pm$ 0.33  |
| <i>Phascolarctobacterium</i>     | 2.91 $\pm$ 0.42  | 3.49 $\pm$ 1.33  | 1.67 $\pm$ 0.59  |
| <i>Succinivibrio</i>             | 2.61 $\pm$ 0.48  | 1.73 $\pm$ 0.16  | 0.92 $\pm$ 0.07  |
| <i>Coprococcus</i>               | 1.26 $\pm$ 0.21  | 4.09 $\pm$ 0.67  | 2.29 $\pm$ 0.83  |
| <i>Oscillibacter</i>             | 0.25 $\pm$ 0.05  | 2.76 $\pm$ 0.61  | 1.46 $\pm$ 0.24  |
| <i>Bacteroides</i>               | 1.73 $\pm$ 0.6   | 2.76 $\pm$ 1.24  | 0.07 $\pm$ 0.03  |
| <i>Paraprevotella</i>            | 0.81 $\pm$ 0.27  | 2.72 $\pm$ 0.91  | 1.16 $\pm$ 0.21  |
| <i>Barnesiella</i>               | 1.52 $\pm$ 0.37  | 1.28 $\pm$ 0.2   | 14.49 $\pm$ 2.33 |
| <i>Lactobacillus</i>             | 1.28 $\pm$ 0.36  | 7.43 $\pm$ 0.91  | 3.58 $\pm$ 0.73  |
| <i>Clostridium sensu stricto</i> | 2.61 $\pm$ 1.07  | 0.7 $\pm$ 0.17   | 0.74 $\pm$ 0.23  |

**Table S7.** Distribution of 16 key genus identified by difference analysis.

| Taxonomy                                                   | con            | HD          | LD              |
|------------------------------------------------------------|----------------|-------------|-----------------|
| f__Lactobacillaceae; g__ <i>Lactobacillus</i>              | 0.01±0.0004    | 0.11±0.10   | 0.08±0.01       |
| f__Porphyromonadaceae; g__unclassified                     | 0.04±0.003     | 0.06±0.01   | 0.04±0.004      |
| f__Rikenellaceae; g__ <i>Alistipes</i>                     | 0.07±0.03      | 0.11±0.09   | 0.02±0.005      |
| f__Ruminococcaceae; g__ <i>Ruminococcus</i>                | 0.01±0.0009    | 0.05±0.009  | 0.02±0.01       |
| f__Acidaminococcaceae;<br>g__ <i>Phascolarctobacterium</i> | 0.01±0.01      | 0.05±0.03   | 0.02±0.004      |
| f__Prevotellaceae; g__ <i>Prevotella</i>                   | 0.02±0.02      | 0.08±0.03   | 0.06±0.02       |
| f__Fusobacteriaceae; g__ <i>Fusobacterium</i>              | 0.03±0.004     | 0.01±0.009  | 0.01±0.0004     |
| f__Porphyromonadaceae;<br>g__ <i>Parabacteroides</i>       | 0.009±0.002    | 0.04±0.01   | 0.03±0.002      |
| f__Porphyromonadaceae; g__ <i>Barnesiella</i>              | 0.01±0.001     | 0.008±0.005 | 0.13±0.02       |
| f__Bacteroidaceae; g__ <i>Bacteroides</i>                  | 0.001±0.0005   | 0.03±0.02   | 0.009±0.008     |
| f__Bifidobacteriaceae; g__ <i>Bifidobacterium</i>          | 0.0001±0.00008 | 0.06±0.02   | 0.00006±0.00002 |
| f__Ruminococcaceae; g__ <i>Oscillibacter</i>               | 0.007±0.002    | 0.02±0.003  | 0.01±0.003      |
| f__Ruminococcaceae; g__ <i>Clostridium IV</i>              | 0.004±0.002    | 0.04±0.007  | 0.003±0.0003    |
| f__Lachnospiraceae; g__ <i>Coprococcus</i>                 | 0.007±0.005    | 0.04±0.004  | 0.02±0.003      |
| f__Ruminococcaceae; g__ <i>Faecalibacterium</i>            | 0.007±0.005    | 0.05±0.02   | 0.03±0.003      |
| Other                                                      | 0.18±0.01      | 0.19±0.02   | 0.17±0.02       |
